# Supplementary material
Source: PubMed Central journal article supplement (PMC2276473)
Supplement: me.2007-0410_1.pdf [file me.2007-0410_1.pdf]

## RETRACTION

The authors of “Antidiabetogenic effects of chromium mitigate hyperinsulinemia-induced cellular insulin resistance via correction of plasma membrane cholesterol imbalance”, Emily M. Horvath, Lixuan Tackett, Alicia M. McCarthy, Priya Raman, Joseph T. Brozinick, and Jeffrey S. Elmendorf (*Molecular Endocrinology* 22:937-950, 2008), are retracting this manuscript because one of the authors, Emily M. Horvath, admitted to altering data in four of the figures. Specifically in Figures 2C, 5, 6D, and 11, some of the values were incorrectly reported for the radioactive glucose uptake assays. None of the other authors associated with this publication were aware of the data manipulation. We sincerely regret if this has caused problems with investigators that have used this information experimentally.

Posted online 26 April 2010
